# Supplementary material for: Optimisation of Vitamin B12 Extraction from Green Edible Seaweed (Ulva lactuca) by Applying the Central Composite Design
Source: MDPI journal article supplement (doi:10.3390/molecules27144459), 2022-07-12
Supplement: s1 [file s1]

**Supplementary Table S4: Table of ANOVA for the [Cn-Cbl] extracted from ODU using 2-Level Factorial**

| Source                             | Sum of Squares | df | Mean Square | F-value | p-value              |
|------------------------------------|----------------|----|-------------|---------|----------------------|
| <b>Model</b>                       | 0.0008         | 7  | 0.0001      | 76.53   | < 0.0001 significant |
| A-Solvent:solvent ratio (MeOH:H2O) | 0.0000         | 1  | 0.0000      | 10.53   | 0.0070               |
| B-pH                               | 0.0001         | 1  | 0.0001      | 49.69   | < 0.0001             |
| C-Solute:solvent ratio             | 2.448E-06      | 1  | 2.448E-06   | 1.69    | 0.2180               |
| AB                                 | 0.0004         | 1  | 0.0004      | 261.72  | < 0.0001             |
| AC                                 | 0.0003         | 1  | 0.0003      | 184.21  | < 0.0001             |
| BC                                 | 0.0000         | 1  | 0.0000      | 20.66   | 0.0007               |
| ABC                                | 0.0000         | 1  | 0.0000      | 7.22    | 0.0198               |
| Curvature                          | 0.0001         | 1  | 0.0001      | 60.40   | < 0.0001             |
| <b>Pure Error</b>                  | 0.0000         | 12 | 1.448E-06   |         |                      |
| <b>Cor Total</b>                   | 0.0009         | 20 |             |         |                      |
