# Supplementary material for: Optimisation of Vitamin B12 Extraction from Green Edible Seaweed (Ulva lactuca) by Applying the Central Composite Design
Source: MDPI journal article supplement (doi:10.3390/molecules27144459), 2022-07-12
Supplement: s1 [file s1]

**Supplementary Table S6: Table of experimental run for the validation of CCD**

| <b>Response</b> | <b>Predicted (mg/100 g dw)</b> | <b>Actual (mg/100 g dw)</b> |
|-----------------|--------------------------------|-----------------------------|
| Conc. of CN-Cbl | 3.5743                         | 3.1617                      |

*95 % PI = 95 % prediction interval; Two-sided    Confidence = 95%*
