# Supplementary material for: Optimisation of Vitamin B12 Extraction from Green Edible Seaweed (Ulva lactuca) by Applying the Central Composite Design
Source: MDPI journal article supplement (doi:10.3390/molecules27144459), 2022-07-12
Supplement: s1 [file s1]

**Supplementary Table S5: Table of ANOVA for the [Cn-Cbl] extracted from ADU using 2-Level Factorial**

| Source                             | Sum of Squares | df | Mean Square | F-value | p-value |             |
|------------------------------------|----------------|----|-------------|---------|---------|-------------|
| <b>Model</b>                       | 0.0001         | 7  | 0.0000      | 10.49   | 0.0003  | significant |
| A-Solvent:solvent ratio (MeOH:H2O) | 4.951E-06      | 1  | 4.951E-06   | 2.97    | 0.1105  |             |
| B-pH                               | 0.0000         | 1  | 0.0000      | 12.55   | 0.0041  |             |
| C-Solute:solvent ratio             | 0.0000         | 1  | 0.0000      | 17.32   | 0.0013  |             |
| AB                                 | 0.0000         | 1  | 0.0000      | 7.24    | 0.0196  |             |
| AC                                 | 2.031E-06      | 1  | 2.031E-06   | 1.22    | 0.2915  |             |
| BC                                 | 0.0000         | 1  | 0.0000      | 21.41   | 0.0006  |             |
| ABC                                | 0.0000         | 1  | 0.0000      | 10.70   | 0.0067  |             |
| Curvature                          | 0.0000         | 1  | 0.0000      | 9.61    | 0.0092  |             |
| <b>Pure Error</b>                  | 0.0000         | 12 | 1.668E-06   |         |         |             |
| <b>Cor Total</b>                   | 0.0002         | 20 |             |         |         |             |
