# Supplementary material for: Optimisation of Vitamin B12 Extraction from Green Edible Seaweed (Ulva lactuca) by Applying the Central Composite Design
Source: MDPI journal article supplement (doi:10.3390/molecules27144459), 2022-07-12
Supplement: s1 [file s1]

**Supplementary Table S1:** The concentrations of CN-Cbl obtained through the boiling, orbital shaking and ultrasonic assisted extraction methods

| Run | Parameters                                          |    |                                | Concentration of CN-Cbl (mg/mL) |        |        |        |                 |        |        |        |                     |        |        |        |
|-----|-----------------------------------------------------|----|--------------------------------|---------------------------------|--------|--------|--------|-----------------|--------|--------|--------|---------------------|--------|--------|--------|
|     | Solvent:solvent<br>ratio<br>(MeOH:H <sub>2</sub> O) | pH | Solute:solvent<br>ratio (g/mL) | Boiling                         |        |        |        | Orbital Shaking |        |        |        | Ultrasonic assisted |        |        |        |
|     |                                                     |    |                                | ODB                             | SDB    | ADB    | FDB    | ODO             | SDO    | ADO    | FDO    | ODU                 | SDU    | ADU    | FDU    |
| 1   | 25:75                                               | 3  | 3:60                           | 0.0155                          | 0.0090 | 0.0122 | 0.0067 | 0.0265          | 0.0155 | 0.0170 | 0.0178 | 0.0224              | 0.0131 | 0.0153 | 0.0167 |
| 2   | 25:75                                               | 3  | 3:60                           | 0.0210                          | 0.0093 | 0.0075 | 0.0066 | 0.0170          | 0.0261 | 0.0241 | 0.0245 | 0.0236              | 0.0159 | 0.0146 | 0.0148 |
| 3   | 75:25                                               | 3  | 3:60                           | 0.0079                          | 0.0049 | 0.0046 | 0.0075 | 0.0085          | 0.0257 | 0.0108 | 0.0106 | 0.0015              | 0.0207 | 0.0168 | 0.0106 |
| 4   | 75:25                                               | 3  | 3:60                           | 0.0083                          | 0.0084 | 0.0087 | 0.0054 | 0.0220          | 0.0234 | 0.0095 | 0.0139 | 0.0015              | 0.0134 | 0.0175 | 0.0133 |
| 5   | 25:75                                               | 5  | 3:60                           | 0.0160                          | 0.0075 | 0.0087 | 0.0067 | 0.0311          | 0.0176 | 0.0133 | 0.0203 | 0.0100              | 0.0116 | 0.0103 | 0.0107 |
| 6   | 25:75                                               | 5  | 3:60                           | 0.0174                          | 0.0079 | 0.0089 | 0.0068 | 0.0210          | 0.0176 | 0.0200 | 0.0262 | 0.0102              | 0.0176 | 0.0098 | 0.0153 |
| 7   | 75:25                                               | 5  | 3:60                           | 0.0126                          | 0.0071 | 0.0129 | 0.0042 | 0.0114          | 0.0159 | 0.0108 | 0.0126 | 0.0103              | 0.0145 | 0.0101 | 0.0136 |
| 8   | 75:25                                               | 5  | 3:60                           | 0.0151                          | 0.0062 | 0.0109 | 0.0056 | 0.0164          | 0.0142 | 0.0140 | 0.0272 | 0.0124              | 0.0112 | 0.0129 | 0.0092 |
| 9   | 25:75                                               | 3  | 3:90                           | 0.0099                          | 0.0071 | 0.0060 | 0.0034 | 0.0146          | 0.0246 | 0.0131 | 0.0156 | 0.0172              | 0.0107 | 0.0136 | 0.0154 |
| 10  | 25:75                                               | 3  | 3:90                           | 0.0084                          | 0.0049 | 0.0036 | 0.0053 | 0.0121          | 0.0356 | 0.0106 | 0.0185 | 0.0163              | 0.0123 | 0.0106 | 0.0165 |
| 11  | 75:25                                               | 3  | 3:90                           | 0.0172                          | 0.0089 | 0.0065 | 0.0079 | 0.0079          | 0.0268 | 0.0170 | 0.0156 | 0.0135              | 0.0175 | 0.0080 | 0.0143 |
| 12  | 75:25                                               | 3  | 3:90                           | 0.0127                          | 0.0093 | 0.0093 | 0.0056 | 0.0087          | 0.0155 | 0.0173 | 0.0158 | 0.0161              | 0.0151 | 0.0093 | 0.0154 |
| 13  | 25:75                                               | 5  | 3:90                           | 0.0090                          | 0.0038 | 0.0108 | 0.0031 | 0.0321          | 0.0161 | 0.0245 | 0.0253 | 0.0018              | 0.0160 | 0.0075 | 0.0089 |
| 14  | 25:75                                               | 5  | 3:90                           | 0.0098                          | 0.0050 | 0.0064 | 0.0046 | 0.0064          | 0.0113 | 0.0124 | 0.0244 | 0.0015              | 0.0163 | 0.0104 | 0.0091 |
| 15  | 75:25                                               | 5  | 3:90                           | 0.0186                          | 0.0068 | 0.0159 | 0.0055 | 0.0286          | 0.0138 | 0.0122 | 0.0178 | 0.0146              | 0.0098 | 0.0134 | 0.0118 |
| 16  | 75:25                                               | 5  | 3:90                           | 0.0193                          | 0.0088 | 0.0160 | 0.0080 | 0.0114          | 0.0155 | 0.0120 | 0.0215 | 0.0173              | 0.0155 | 0.0130 | 0.0108 |
| 17  | 50:50                                               | 4  | 3:75                           | 0.0138                          | 0.0059 | 0.0065 | 0.0051 | 0.0103          | 0.0295 | 0.0159 | 0.0181 | 0.0167              | 0.0125 | 0.0159 | 0.0171 |
| 18  | 50:50                                               | 4  | 3:75                           | 0.0131                          | 0.0075 | 0.0058 | 0.0066 | 0.0119          | 0.0289 | 0.0135 | 0.0198 | 0.0150              | 0.0099 | 0.0145 | 0.0197 |
| 19  | 50:50                                               | 4  | 3:75                           | 0.0188                          | 0.0055 | 0.0071 | 0.0069 | 0.0190          | 0.0307 | 0.0159 | 0.0227 | 0.0178              | 0.0117 | 0.0139 | 0.0191 |
| 20  | 50:50                                               | 4  | 3:75                           | 0.0144                          | 0.0110 | 0.0118 | 0.0054 | 0.0133          | 0.0192 | 0.0229 | 0.0127 | 0.0181              | 0.0092 | 0.0137 | 0.0167 |
| 21  | 50:50                                               | 4  | 3:75                           | 0.0140                          | 0.0104 | 0.0093 | 0.0065 | 0.0157          | 0.0155 | 0.0275 | 0.0174 | 0.0157              | 0.0105 | 0.0126 | 0.0173 |

ODB: Oven-dried, extracted by boiling method

SDB: Sun-dried sample, extracted by boiling method

ADB: Air-dried sample, extracted by boiling method

FDB: Freeze-dried, extracted by boiling method

ODO: Oven-dried, extracted by orbital shaking method

SDO: Sun-dried, extracted by orbital shaking method

ADO: Air-dried, extracted by orbital shaking method

FDO: Freeze-dried, extracted by orbital shaking method

ODU: Oven-dried, extracted by ultrasonic-assisted extraction method

SDU: Sun-dried, extracted by ultrasonic-assisted extraction method

ADU: Air-dried, extracted by ultrasonic-assisted extraction method

FDU: Freeze-dried, extracted by ultrasonic-assisted extraction method
