# Supplementary material for: Optimisation of Vitamin B12 Extraction from Green Edible Seaweed (Ulva lactuca) by Applying the Central Composite Design
Source: MDPI journal article supplement (doi:10.3390/molecules27144459), 2022-07-12
Supplement: s1 [file s1]

**Supplementary Table S3: Table of ANOVA for the [Cn-Cbl] extracted from ADB using 2-Level Factorial**

| Source                             | Sum of Squares | df | Mean Square | F-value | p-value |             |
|------------------------------------|----------------|----|-------------|---------|---------|-------------|
| <b>Model</b>                       | 0.0002         | 7  | 0.0000      | 4.57    | 0.0106  | significant |
| A-Solvent:solvent ratio (MeOH:H2O) | 0.0000         | 1  | 0.0000      | 5.27    | 0.0406  |             |
| B-pH                               | 0.0001         | 1  | 0.0001      | 12.69   | 0.0039  |             |
| C-Solute:solvent ratio             | 2.563E-10      | 1  | 2.563E-10   | 0.0001  | 0.9945  |             |
| AB                                 | 0.0000         | 1  | 0.0000      | 5.45    | 0.0378  |             |
| AC                                 | 0.0000         | 1  | 0.0000      | 5.57    | 0.0361  |             |
| BC                                 | 0.0000         | 1  | 0.0000      | 2.82    | 0.1186  |             |
| ABC                                | 9.521E-07      | 1  | 9.521E-07   | 0.1859  | 0.6740  |             |
| Curvature                          | 5.488E-06      | 1  | 5.488E-06   | 1.07    | 0.3210  |             |
| <b>Pure Error</b>                  | 0.0001         | 12 | 5.120E-06   |         |         |             |
| <b>Cor Total</b>                   | 0.0002         | 20 |             |         |         |             |
