# Supplementary material for: Optimisation of Vitamin B12 Extraction from Green Edible Seaweed (Ulva lactuca) by Applying the Central Composite Design
Source: MDPI journal article supplement (doi:10.3390/molecules27144459), 2022-07-12
Supplement: s1 [file s1]

**Supplementary Table S2: Table of ANOVA for the [Cn-Cbl] extracted from ODB using 2-Level Factorial**

| Source                                          | Sum of Squares | df | Mean Square | F-value | p-value                 |
|-------------------------------------------------|----------------|----|-------------|---------|-------------------------|
| <b>Model</b>                                    | 0.0003         | 7  | 1539.82     | 22.26   | < significant<br>0.0001 |
| A-Solvent:solvent ratio (MeOH:H <sub>2</sub> O) | 57.02          | 1  | 57.02       | 0.8245  | 0.3852                  |
| B-pH                                            | 1086.47        | 1  | 1086.47     | 15.71   | 0.0027                  |
| C-Solute:solvent ratio                          | 161.96         | 1  | 161.96      | 2.34    | 0.1569                  |
| AB                                              | 1117.35        | 1  | 1117.35     | 16.16   | 0.0024                  |
| AC                                              | 7713.28        | 1  | 7713.28     | 111.52  | < 0.0001                |
| BC                                              | 192.03         | 1  | 192.03      | 2.78    | 0.1266                  |
| ABC                                             | 450.64         | 1  | 450.64      | 6.52    | 0.0287                  |
| Curvature                                       | 156.36         | 1  | 156.36      | 2.26    | 0.1636                  |
| <b>Pure Error</b>                               | 691.62         | 10 | 69.16       |         |                         |
| <b>Cor Total</b>                                | 11626.73       | 18 |             |         |                         |
